# Supplementary material
Source: HighWire-hosted journal article supplement (https://bmjopen.bmj.com/content/9/8/e028664)
Supplement: inline-supplementary-material-2 [file inline-supplementary-material-2.pdf]

## Supplementary-file-2

Ethics committees' names and approval registration number

| NO. | Hospital                                                                                         | Ethics committee name                                                                                        | Approval number   |
|-----|--------------------------------------------------------------------------------------------------|--------------------------------------------------------------------------------------------------------------|-------------------|
| 1   | Zhongda Hospital, Southeast University                                                           | Independent Ethics Committee for Clinical Research of Zhongda Hospital, Affiliated with Southeast University | 2017ZDSYLL025-P01 |
| 2   | Yantai Yuhuangding Hospital                                                                      | Medical Ethics Committee of Yantai Yuhuangding Hospital                                                      | [2017]No. 17      |
| 3   | Beijing Friendship Hospital Affiliated with Capital Medical University                           | Medical Ethics Committee of Beijing Friendship Hospital Affiliated with Capital Medical University           | 2017-P2-083-02    |
| 4   | Northern Jiangsu People's Hospital                                                               | Medical Ethics Committee of Northern Jiangsu People's Hospital                                               | 2017045           |
| 5   | The First Affiliated Hospital of Chongqing Medical University                                    | Ethics Committee of The First Affiliated Hospital of Chongqing Medical University                            | 20172501          |
| 6   | Yantaishan Hospital, Yantai                                                                      | The Clinical Trial Ethics Committee of Yantaishan Hospital                                                   | 2017004           |
| 7   | The Affiliated Hospital of Henan University of Science and Technology                            | Medical Ethics Committee of The Affiliated Hospital of Henan University of Science and Technology            | 2017-0044         |
| 8   | Zhejiang Provincial People's Hospital                                                            | Medical Ethics Committee of Zhejiang Provincial People's Hospital                                            | 2017KY019         |
| 9   | The Second Affiliated Hospital of Harbin Medical University                                      | Medical Ethics Committee of the Second Affiliated Hospital of Harbin Medical University                      | KY2017-241        |
| 10  | Shenzhen Hospital of Traditional Chinese Medicine                                                | Medical Ethics Committee of Shenzhen Hospital of Traditional Chinese Medicine                                | (2017)18          |
| 11  | Tianjin Medical University General Hospital                                                      | Medical Ethics Committee of Tianjin Medical University General Hospital                                      | IRB2017-130-01    |
| 12  | The First Affiliated Hospital of Nanjing Medical University (Jiangsu Province People's Hospital) | Ethics Committee of the First Affiliated Hospital of Nanjing Medical University                              | 2017-SR-215       |
| 13  | Zhongshan Hospital, Fudan University                                                             | Medical Ethics Committee of Zhongshan Hospital, Fudan University                                             | B2017-138         |
| 14  | The First Affiliated Hospital of Nanchang University                                             | Ethics Committee for Medical Research of the First Affiliated Hospital of Nanchang University                | 2017-059          |

| NO. | Hospital                                                                         | Ethics committee name                                                                                      | Approval number   |
|-----|----------------------------------------------------------------------------------|------------------------------------------------------------------------------------------------------------|-------------------|
| 15  | Chinese PLA Rocket General Hospital (Second Artillery General Hospital PLA)      | Ethics Committee of Second Artillery General Hospital PLA                                                  | KY2017016         |
| 16  | Tianjin Third Central Hospital                                                   | Medical Ethics Committee of Tianjin Third Central Hospital                                                 | IRB2017-011-01    |
| 17  | Zhongnan Hospital of Wuhan University                                            | Medical Ethics Committee of Zhongnan Hospital of Wuhan University                                          | 2017020           |
| 18  | The First Affiliated Hospital of China Medical University                        | Ethics Committee for Medical Science Research of the First Affiliated Hospital of China Medical University | 2017-166-2        |
| 19  | The First People's Hospital of Foshan                                            | Medical Ethics Committee of the First People's Hospital of Foshan                                          | 2017-8            |
| 20  | First Hospital of Shanxi Medical University                                      | Ethics Committee of First Hospital of Shanxi Medical University                                            | 2017-K030         |
| 21  | Central Hospital Affiliated to Shenyang Medical College                          | Medical Department of Central Hospital Affiliated to Shenyang Medical College                              | NO                |
| 22  | Xinhua Hospital Affiliated with Shanghai Jiao Tong University School of Medicine | Xinhua Hospital Ethics Committee Affiliated with Shanghai Jiao Tong University School of Medicine          | XHEC-C-2017-046-2 |
| 23  | Qilu Hospital of Shandong University (Qingdao)                                   | Ethics Committee of Qilu Hospital of Shandong University (Qingdao)                                         | NO                |
| 24  | Wuhan General Hospital of Guangzhou Military                                     | Medical Ethics Committee of Wuhan General Hospital of Guangzhou Military                                   | [2017]023-1       |
| 25  | Henan Province People's Hospital                                                 | Medical Ethics Committee of Henan Province People's Hospital                                               | 2017(56)          |
| 26  | Affiliated Hospital of Guizhou Medical University                                | Ethics Committee for Drug Clinical Trials of Affiliated Hospital of Guizhou Medical University             | 2017-135          |
| 27  | China-Japan Friendship Hospital                                                  | Ethics Committee for Clinical Research of China-Japan Friendship Hospital                                  | 2017-110          |
| 28  | First Affiliated Hospital, Heilongjiang University of Chinese Medicine           | Ethics Committee of First Affiliated Hospital, Heilongjiang University of Chinese Medicine                 | HZYLLKY201700601  |
| 29  | The First Hospital of Jilin University                                           | Ethics Committee of The First Hospital of Jilin University                                                 | 2017-327          |
| 30  | Hunan Provincial People's Hospital                                               | Medical Ethics Committee of Hunan Provincial People's Hospital                                             | [2018]-03         |
| 31  | Shanghai General Hospital                                                        | Shanghai General Hospital Institutional Review Board                                                       | [2018]02          |
| 32  | Shanghai Changzheng Hospital                                                     | Medical Ethics Committee of Shanghai Changzheng Hospital                                                   | 2018SL005         |

| NO. | Hospital                                                                                                                        | Ethics committee name                                                                                                      | Approval number |
|-----|---------------------------------------------------------------------------------------------------------------------------------|----------------------------------------------------------------------------------------------------------------------------|-----------------|
| 33  | The Third Xiangya Hospital of Central South University                                                                          | Institutional Review Board of The Third Xiangya Hospital of Central South University                                       | R17020          |
| 34  | The Affiliated Hospital of Inner Mongolia Medical University                                                                    | Ethics Committee of The Affiliated Hospital of Inner Mongolia Medical University                                           | 2017(016)       |
| 35  | The First Affiliated Hospital of Zhengzhou University                                                                           | Ethics Committee for Scientific Research and Clinical Trials of the First Affiliated Hospital of Zhengzhou University      | Drug-2017-85    |
| 36  | First Affiliated Hospital of the Air Force Medical University (First Affiliated Hospital of Fourth Military Medical University) | Independent Ethics Committee for Drug Clinical Trials of First Affiliated Hospital of Fourth Military Medical University   | KY20172100-1    |
| 37  | Yijishan Hospital of Wannan Medical College                                                                                     | Scientific Research Institutional Review Board of Yijishan Hospital of Wannan Medical College                              | 2018(04)        |
| 38  | Shanghai Sixth People's Hospital                                                                                                | Ethics Committee of Shanghai Sixth People's Hospital                                                                       | 2018-012        |
| 39  | The North Hospital of Ruijin Hospital Affiliated with Shanghai Jiao Tong University School of Medicine                          | Ethics Committee of The North Hospital of Ruijin Hospital Affiliated with Shanghai Jiao Tong University School of Medicine | 2018(009)-1     |
| 40  | Peking Union Medical College Hospital of the Chinese Academy of Medical Sciences                                                | Institutional Review Board of Peking Union Medical College Hospital of the Chinese Academy of Medical Sciences             | B248            |
| 41  | First Affiliated Hospital of Kunming Medical University                                                                         | Ethics Committee of First Affiliated Hospital of Kunming Medical University                                                | 2018-12         |
| 42  | The First Hospital of Lanzhou University                                                                                        | Ethics Committee for Drug Clinical Trials of The First Hospital of Lanzhou University                                      | 2018-13         |
| 43  | Chinese PLA General Hospital                                                                                                    | Medical Ethics Committee of Chinese PLA General Hospital                                                                   | S2018-011-01    |
| 44  | Yanbian University Hospital                                                                                                     | Medical Ethics Committee of Yanbian University Hospital                                                                    | 2018138         |
| 45  | The Affiliated Hospital of Qingdao University                                                                                   | Medical Ethics Committee of The Affiliated Hospital of Qingdao University                                                  | QYFYKYL 2018-20 |
